# Supplementary material for: A unique miR775-GALT9 module regulates leaf senescence in Arabidopsis during post-submergence recovery by modulating ethylene and the abscisic acid pathway
Source: Oxford University Press journal article supplement (doi:10.1242/dev.199974), 2022-01-14
Supplement: dev199974supp.pdf [file dev199974supp.pdf]

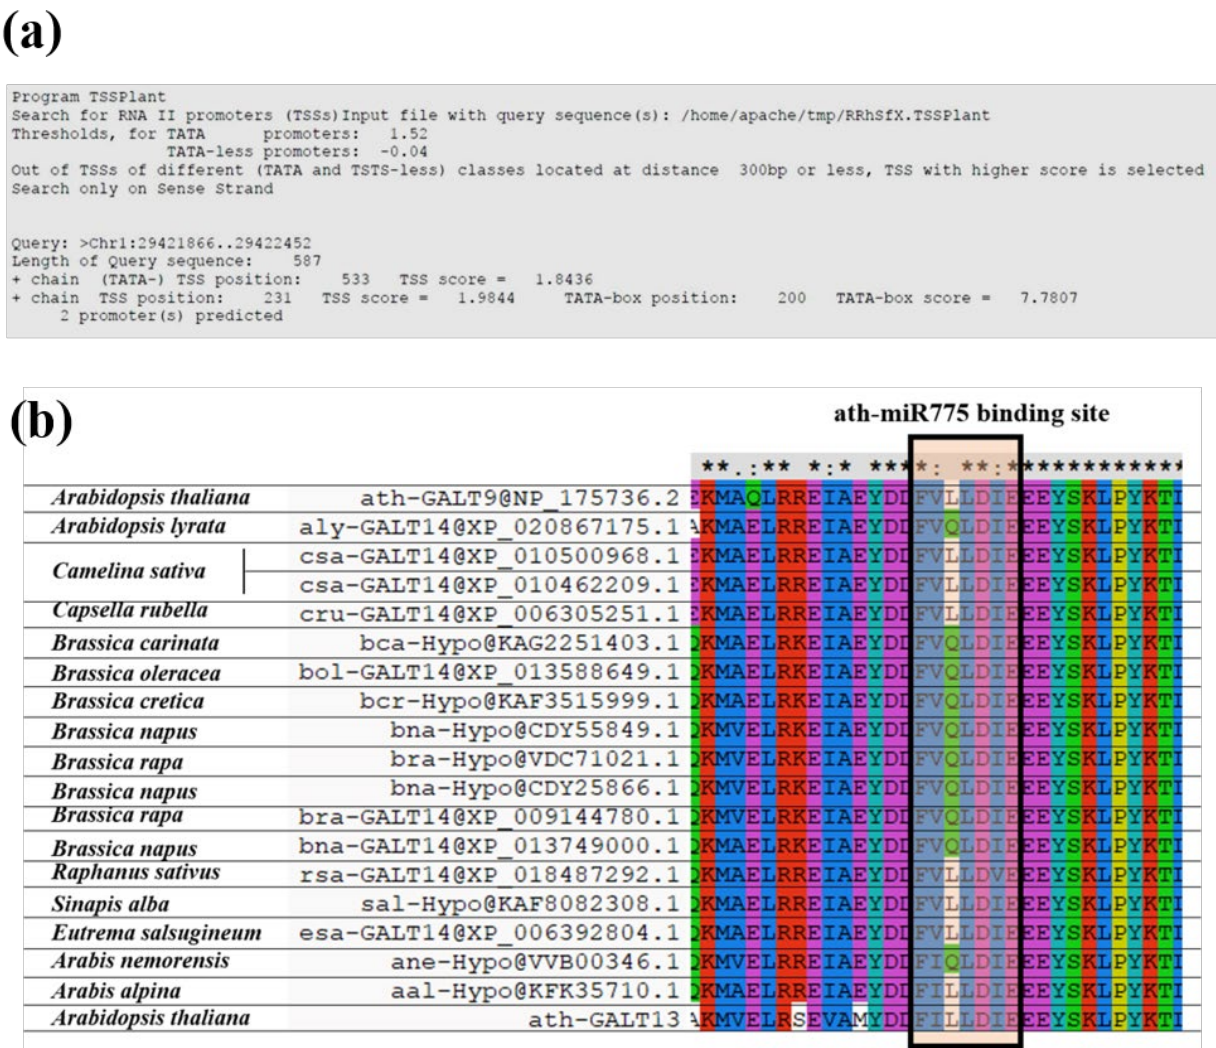

**Fig. S1. *In silico* analysis of miR775 and its target GALT9. (a)** A screenshot of the result of program TSSPlant showing predicted Transcription Start Site (TSS) and TATA-Box. **(b)** Multiple sequence alignment of *GALT9* homologs showing miR775 binding site conservation.

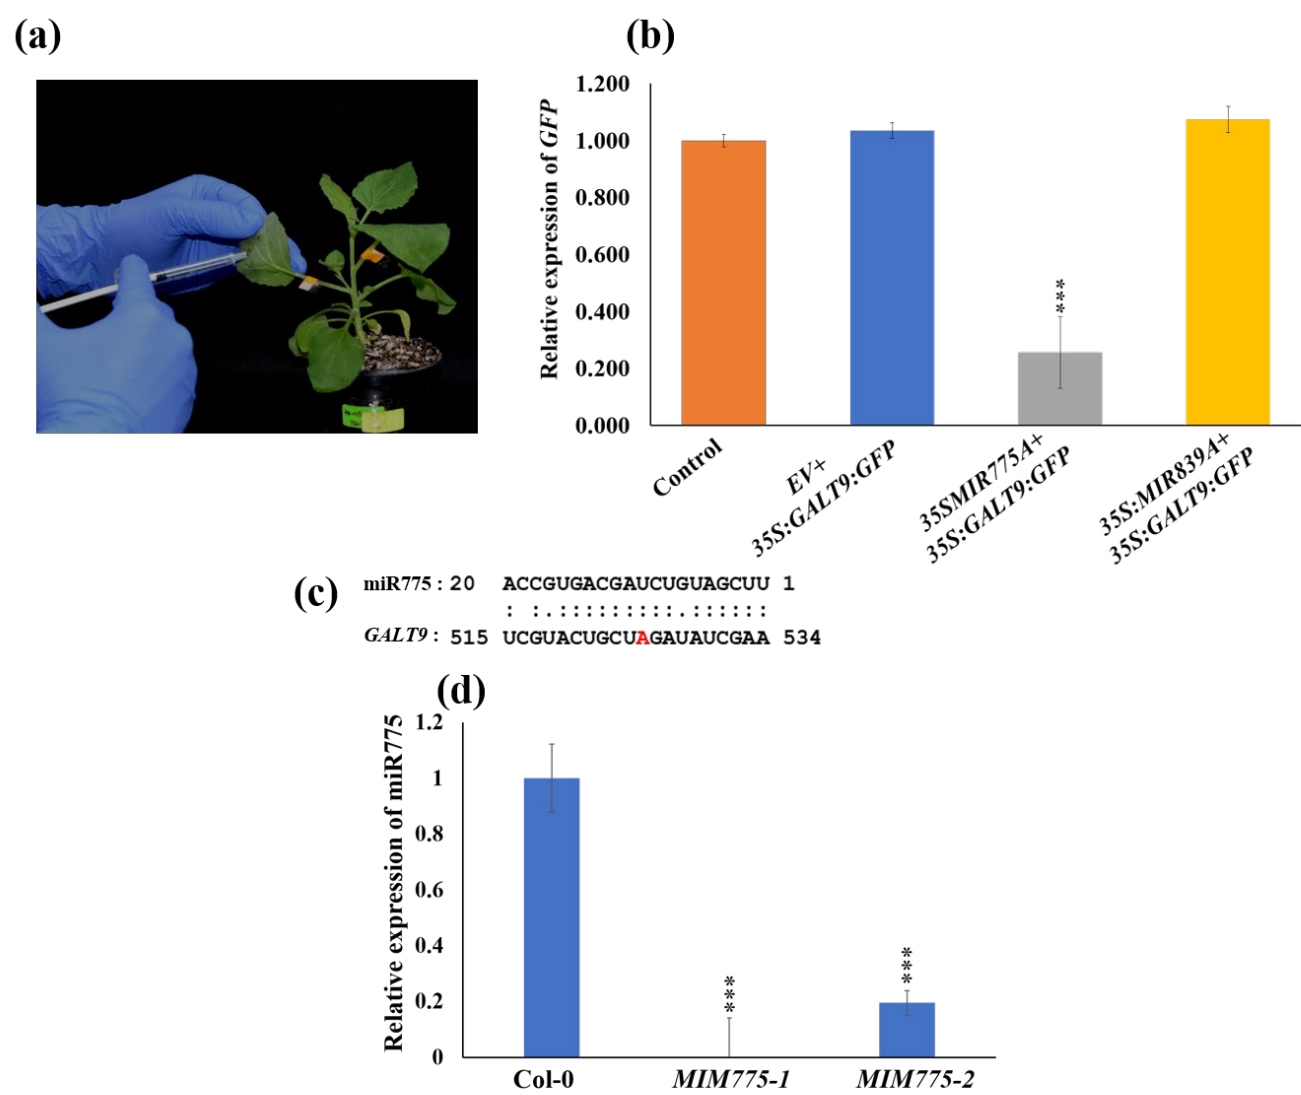

**Fig. S2. miR775 cleaves its predicted target *GALT9* in a transient assay carried out in tobacco (*N. benthamiana*) leaves. (a)** Co-infiltration of *MIR775A* and *GALT9* (*35S:MIR775A*+*35S:GALT9:GFP*) wiin leaf of tobacco plants (~4 weeks old). **(b)** Relative expression level of *GFP* in control (*35S:GALT9:GFP*), EV +*35S:GALT9:GFP*, *35S:MIR775A*+*35S:GALT9:GFP*, and *35S:MIR839A*+*35S:GALT9:GFP*. **(c)** Sequence alignment of the mature miR775 with the target *GALT9*. **(d)** Relative expression of mature miR775 in *MIM775* lines.

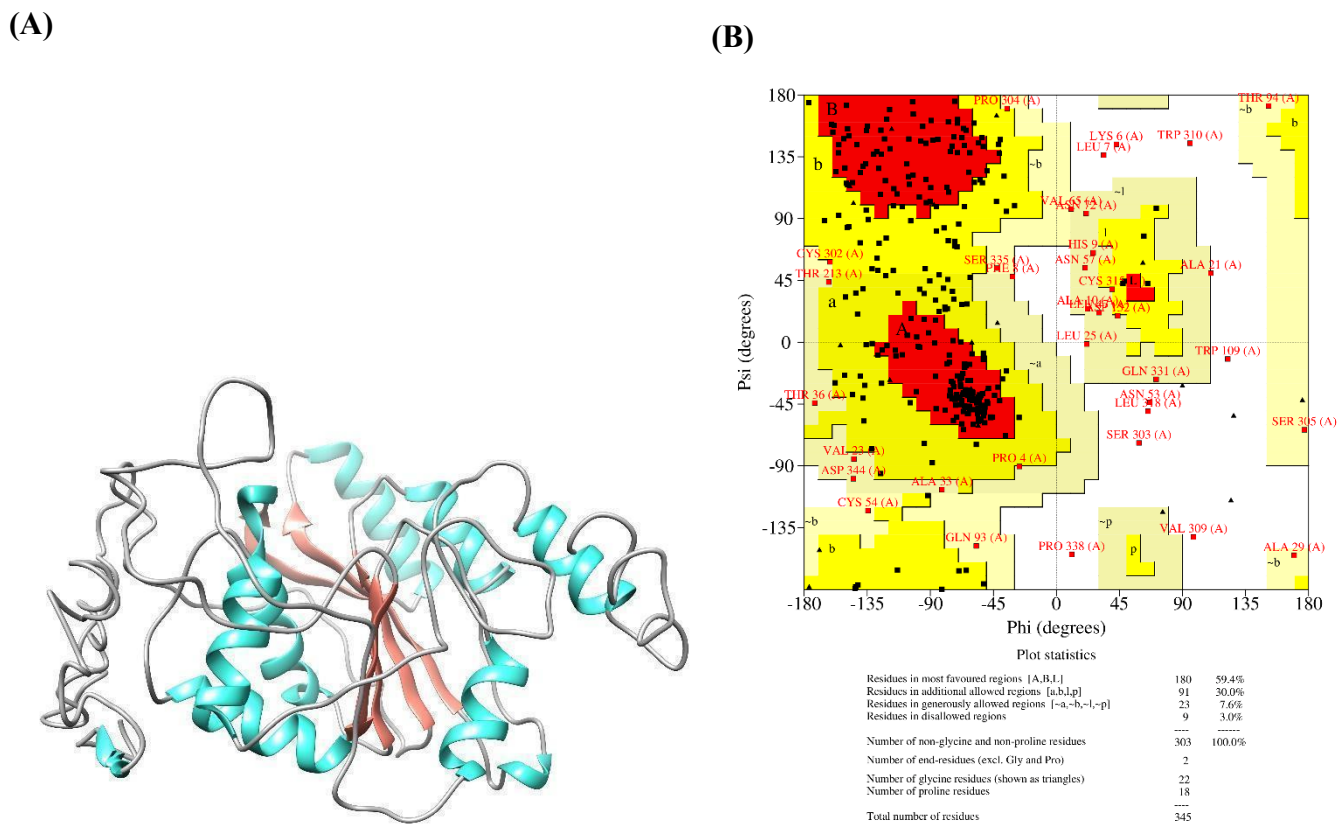

**Fig. S3. Modeled 3D structure of GALT9 and its quality check.** (A) Best predicted model of GALT9 through I-TASSER and visualized through UCSF Chimera v1.14. The  $\alpha$ -helix is represented in cyan,  $\beta$ -sheets in brown and the coiled coil in grey. (B) Stereochemical quality was checked through Ramachandran plot available online at PROCHECK server (<https://saves.mbi.ucla.edu/>), showing 97% of amino acids were in allowed region.

(A)

Predicted function using COFACTOR and COACH

(This section reports biological annotations of the target protein by COFACTOR and COACH based on the I-TASSER structure prediction. While COFACTOR deduces protein functions (ligand-binding sites, EC and GO) using structure comparison and protein-protein network: results (on ligand-binding sites) from the COFACTOR, TM-SITE and S-SITE programs.)

Ligand binding sites

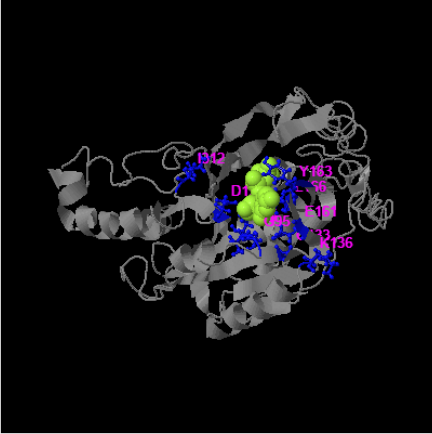

Click to view

| Rank | C-score | Cluster size | PDB Hit | Lig Name | Download Complex | Ligand Binding Site Residues                          |
|------|---------|--------------|---------|----------|------------------|-------------------------------------------------------|
| 1    | 0.10    | 11           | 3otkA   | UDP      | Rep. Mult        | 93,94,95,133,136,161,163,166,190,312                  |
| 2    | 0.08    | 9            | 2AM3A   | 2AM3A00  | Rep. Mult        | 93,94,160,161,162,163,165,166,169,231,274,275,276,277 |
| 3    | 0.07    | 7            | 2j0bA   | UDP      | Rep. Mult        | 93,94,95,98,101,169,190,191,192,311                   |
| 4    | 0.03    | 3            | 5ej1A   | BGC      | Rep. Mult        | 166,190,248,275,277                                   |
| 5    | 0.03    | 3            | 2FFUA   | 2FFUA00  | Rep. Mult        | 163,228,229,230,231,248,249,298,299,300,301,311,344   |

[Download](#) the residue-specific ligand binding probability, which is estimated by SVM.  
[Download](#) the all possible binding ligands and detailed prediction summary.  
[Download](#) the templates clustering results.  
(a) C-score is the confidence score of the prediction. C-score ranges [0-1], where a higher score indicates a more reliable prediction.  
(b) Cluster size is the total number of templates in a cluster.  
(c) Lig Name is name of possible binding ligand. Click the name to view its information in [the BioLiP database](#).  
(d) Rep is a single complex structure with the most representative ligand in the cluster, i.e., the one listed in the Lig Name column.  
Mult is the complex structures with all potential binding ligands in the cluster.

Reset to initial orientation

☒ Spin On/Off

(B)

Receptor Information

PDB ID

3otk

Chain

A

Resolution

2.3 Å

UniProt ID

Q92324 (Beta-1,3-galactosyl-0-glycosyl-glycoprotein beta-1,6-N-acetylglucosaminyltransferase)

Ligand Binding/Catalytic Sites

Ligand Information

ID

UDP

Name (Show Synonyms)

URIDINE-DIPHOSPHATE

Chemaxon Viewer

The version number of the Java plugin is lower than 1.6. Current Marvin requires at least version 1.6.

Binding Affinity

Global View, download [receptor](#), [ligand](#)

Local View

Ligand-Protein Interaction





Reset to initial orientation

☒ spin

Reset to initial orientation

☒ spin

Catalytic Site Residues

N/A

Enzyme Commission

EC Number

2.4.1.102

Name

Beta-1,3-galactosyl-0-glycosyl-glycoprotein beta-1,6-N-acetylglucosaminyltransferase

Gene Ontology

GO Terms

Name

GO:0000139

Golgi membrane

GO:0003829

beta-1,3-galactosyl-0-glycosyl-glycoprotein beta-1,6-N-acetylglucosaminyltransferase activity

GO:0005794

Golgi apparatus

GO:0006486

protein glycosylation

GO:0008375

acetylglucosaminyltransferase activity

GO:0016020

membrane

GO:0016021

integral to membrane

GO:0016740

transferase activity

GO:0016757

transferase activity, transferring glycosyl groups

GO:0048729

tissue morphogenesis

GO:0060993

kidney morphogenesis

**Fig. S4. Functional annotation of GALT9 through in silico analysis. (A)** Screenshot of I-TASSER result showing predicted biological annotation of GALT9. **(B)** Screenshot of BioLiP (biologically relevant ligand-protein binding interactions) database showing the Function Annotation of 3otk, which is a significant PDB hit of predicted GALT9 3D structure.



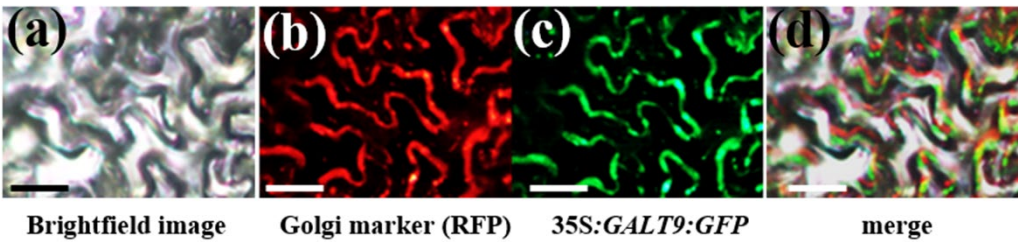

**Fig. S5. GALT9 localizes in the Golgi apparatus of a cell.** The fluorescent protein-tagged GALT9 fusion proteins were co-expressed with GmManI-pBIN2 (mCherry Golgi apparatus marker) 6into the abaxial side of a young in tobacco (*N. benthamiana*) leaf epidermis. The signals were visualized 6 under a fluorescence microscope. **(a)** Bright field image of leaf epidermal cells. **(b)** Fluorescence image of *GmManI-pBIN2* (Golgi apparatus marker). **(c)** Fluorescence image of *35S:GALT9:GFP*. **(d)** Image was merged with fluorescence image of GmManI-pBIN2 and *35S:GALT9:GFP*. Scale bar = 50  $\mu$ m.

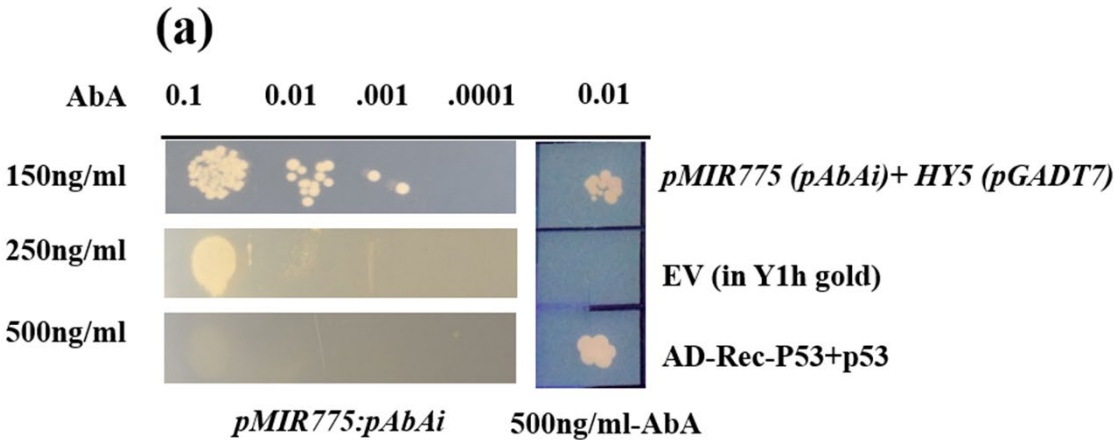

Determination of autoinhibition of AbA, plated on SD-URA plate

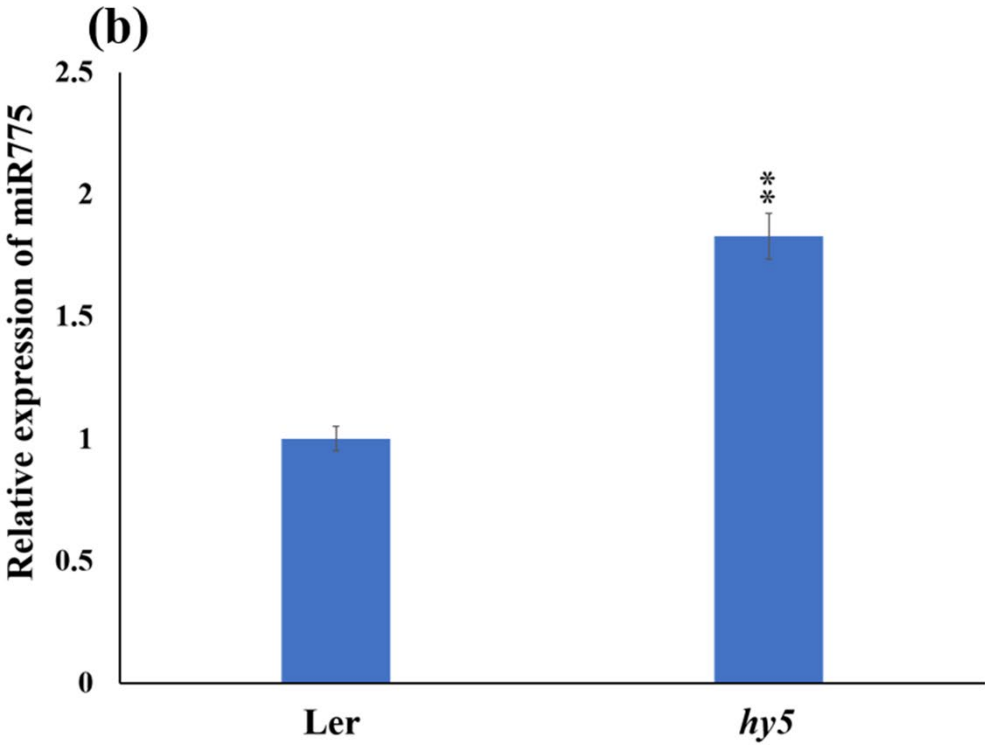

**Fig. S6. HY5 binds to the promoter of *MIR775A* and regulates its expression.** **(a)** Determination of autoactivation, represents Yeast one hybrid (Y1H) assay showing the interaction of HY5 with *pMIR775A*. *HY5* CDS + *pGADT7* transformed into *pMIR775A* + pAbAi was used to check the interaction. pGADT7-Rec-p53/p53-AbAi was used as a positive control. pGADT7 transformed into a Y1H gold cell used a negative control. **(b)** Expression of miR775 in *hy5* mutant background.

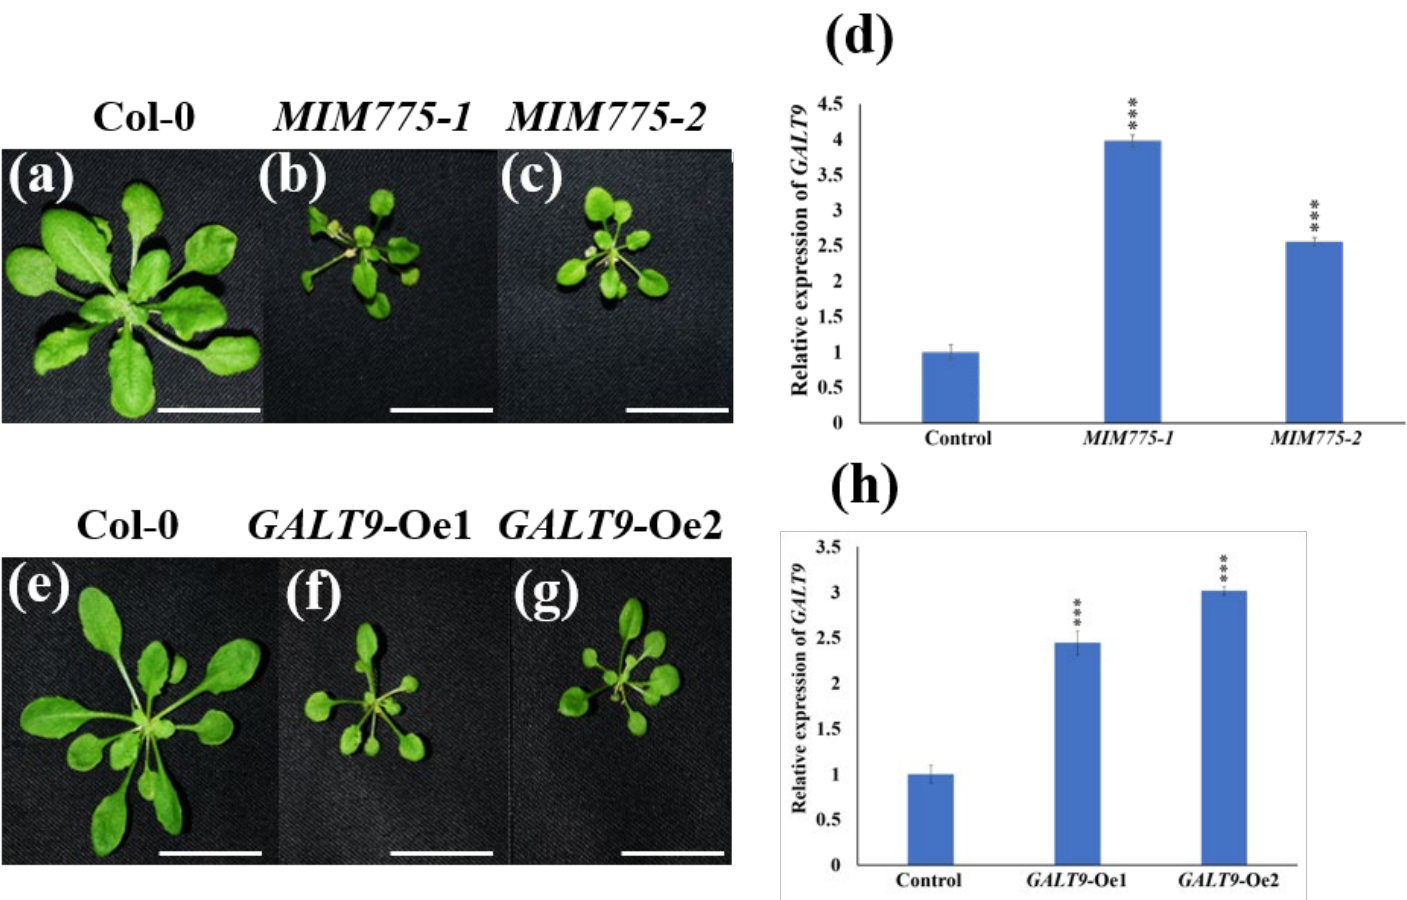

**Fig. S7. Phenotypic comparison of *MIM775* and *GALT9* regulating leaf sizes in *A. thaliana*.** (a-c) Phenotypic comparison of *MIM775* in two independent lines of *MIM775* (*MIM775-1*, *MIM775-2*). (d) Relative expression of *GALT9* in two independent lines *MIM775-1* and *MIM775-2*. (e-g) Phenotypic comparison of *GALT9* in two independent lines of *GALT9* overexpression (*GALT9-Oe1* and *GALT9-Oe2*). (h) Relative expression of *GALT9* in two independent lines of *GALT9-Oe1* and *GALT9-Oe2*. Scale bar= 2.5 cm.

**Table S1. List of probable targets of miR775 validated through cleaveland software using degradome PARE data of 11-days seedling (SRR3143654).**

[Click here to download Table S1](#)

**Table S2. List of probable targets of miR775 validated through cleaveland software using degradome PARE data of Sample leaf of stage 5 (SRR3143654).**

[Click here to download Table S2](#)

**Table S3. List of primers used in the study.**

[Click here to download Table S3](#)

**Table S4. List of coexpressed gene with *GALT9*.**

[Click here to download Table S4](#)
